# Supplementary material
Source: Springer Nature journal article supplement (https://www.springermedizin.de/resource/supplementary/12935_2013_609_MOESM1_ESM.pdf/9540446)

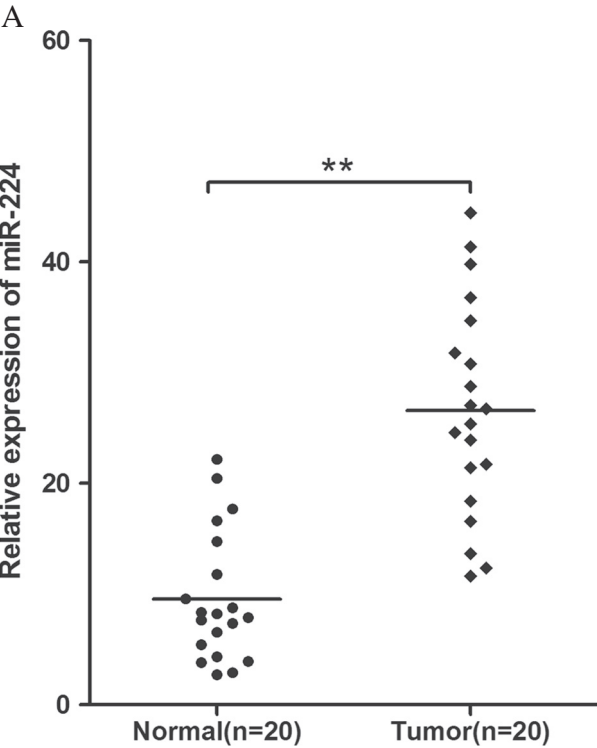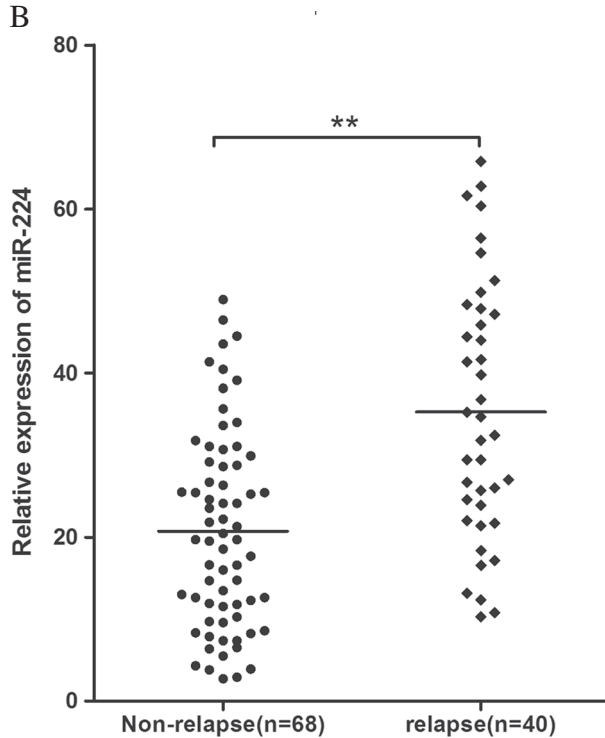

**C**

|              | Relapse | non-relapse | <i>p</i> -Value |
|--------------|---------|-------------|-----------------|
| miR-224 High | 27      | 21          | <0.001**        |
| miR-224 Low  | 13      | 47          |                 |

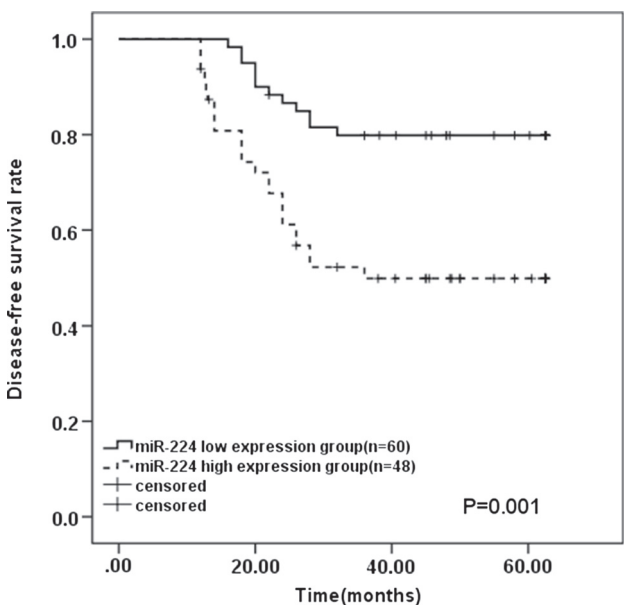

Supplement: MOESM1 [file 9540446]
